# Supplementary material for: Renaming ‘Chemosensory’ Proteins (CSPs): Lipid/Nucleotide-Binding Proteins — Molecular Nomenclature, Structure, Expression, Function, Evolutionary Networks, Clinical Diseases and Associated Molecular Medicine
Source: Preprints.org preprint supplement (doi:10.20944/preprints202312.1863.v1), 2023-12-27
Supplement: Supplementary file 1 [file supplementary]

| Organism | **Order** | **Genome Assembly** | **Gene**  **Structure** | **Transcript Annotation** | **Length (bps)** | **N-terminus** | **C-terminus** | **Identity**  **% (Order subject)** |
| --- | --- | --- | --- | --- | --- | --- | --- | --- |
|  |  |  |  |  |  |  |  |  |
| Acyrthosiphon pisum | Hemiptera | EQ110797 | E1-8697-E2 | ACYPI000094 | 1236 | TSSYPTRY | KLTNNTTK | 92 (Hemiptera) |
|  |  | EQ110797 | E1-1283-E2 | ACYPI009116 | 363 | PAKYTTKY | AKKLNIDV | 90 (Hemiptera) |
|  |  | EQ116326 | E1-3103-E2 | ACYPI002311 | 1039 | LKKFLSTL | FLENLNTD | 78 (Hemiptera) |
|  |  | EQ117790 | E1-586-E2 | ACYPI000097 | 815 | GTAYTTKY | KKKGVVKF | 97 (Hemiptera) |
|  |  | EQ121783 | E1-1378-E2 | ACYPI000093 | 812 | FPAYMKRF | KLNKFLDA | 90 (Hemiptera) |
|  |  | EQ121783 | E1-4739-E2 | ACYPI000345 | 1554 | SGYYLSTY | IINFMNQK | 80 (Hemiptera) |
|  |  | EQ122410 | E1-698-E2-16718-E3 | ACYPI005842 | 844 | KDSSLPNV | LKQYQSGF | 96 (Hemiptera) |
|  |  | EQ125317 | E1-735-E2 | ACYPI000096 | 669 | FTLAEEKY | ERAAAAKH | 95 (Hemiptera) |
|  |  | EQ125317 | E1-3103-E2 | ACYPI003368 | 2009 | EDDDKPDF | TANIVKIQ | 79 (Hemiptera) |
|  |  | EQ126525 | E1-272-E2 | ACYPI000095 | 645 | QEKYSTKY | KKLEKFSA | 91 (Hemiptera) |
|  |  |  |  |  |  |  |  |  |
| Bombyx mori | Lepidoptera | BABH01005933 | E1-93-E2-359-E3 | BmorCSP19 | 351 | AQQNRPQV | AKLRQYAG | 88 (Lepidoptera) |
|  |  | BABH01018301 | Pseudogene (E2) | BmorCSP16 | 189 | -------- | KELRTIKA | 98 Allergen Tha p 1 |
|  |  | BABH01021421 | E1-693-E2-880-E3 | BmorCSP4 | 624 | TSTYYTTQ | TSNVDESK | 56 (Lepidoptera) |
|  |  | BABH01021423 | E1-2020-E2 | BmorCSP9 | 375 | PEQYTDKY | TELKRVTA | 100 (Rhizobiales) |
|  |  | BABH01021424 | E1-747-E2 | BmorCSP6 | 393 | AEKYTDKY | EGFLAGQN | 100 (Enterobacterales) |
|  |  | BABH01021424 | E1-776-E2 | BmorCSP7 | 366 | IARPKTPF | YEAKMESN | 50 (Lepidoptera) |
|  |  | BABH01021424 | E1-566-E2 | BmorCSP8 | 384 | DDKYTDRY | ELDREIKA | 99 (Propionibacteriales) |
|  |  | BABH01021425 | E1-580-E2 | BmorCSP1 | 504 | DDKYTDKY | AKGIVIPE | 99 (Propionibacteriales) |
|  |  | BABH01021426 | Intronless | BmorCSP14 | 360 | ESTYTDKW | IDAVKGSA | 96 Allergen Tha p 1 |
|  |  | BABH01021426 | E1-803-E2 | BmorCSP15 | 366 | AEFYSSRY | DKFINEDD | 74 (Bacillales) |
|  |  | BABH01021427 | E1-2703-E2 | BmorCSP2 | 360 | QDKYEPID | SFKDFLES | 100 (Pseudonocardiales) |
|  |  | BABH01021429 | E1-5137-E2 | BmorCSP17 | 372 | RQQSYPRN | YTFLATGL | 84 Allergen Tha p 1 |
|  |  | BABH01021430 | E1-768-E2 | BmorCSP3 | 754 | LAADLSKY | ADKFLLGS | 72 (Lepidoptera) |
|  |  | BABH01021430 | Pseudogene (E2) | BmorCSP18 | 123 | -------- | AAFVVATD | 100 Allergen Tha p 1 |
|  |  | BABH01021431 | E1-3718-E2 | BmorCSP20 | 402 | QKYYDSRY | FEKVITNA | 68 (Lepidoptera) |
|  |  | BABH01021433 | E1-403-E2 | BmorCSP12 | 366 | KETYSSEN | LLSAVANS | 95 (Propionibacteriales) |
|  |  | BABH01021434 | E1-843-E2 | BmorCSP11 | 372 | EEYYSSQY | TAFINAMD | 98 Allergen Tha p 1 |
|  |  | BABH01021467 | E1-2171-E2 | BmorCSP13 | 381 | DLFYDKKY | KFLETYGH | 61 (Lepidoptera) |
|  |  | BABH01021709 | E1-26820-E2-2758-E3 | BmorCSP10 | 1798 | MPKYDERY | TQMKLKVR | 69 PAN1-like |
|  |  | BABH01034642 | Pseudogene (E1) | BmorCSP5 | 123 | AGSYSDRY | -------- | 100 Allergen Tha p 1 |
|  |  |  |  |  |  |  |  |  |
| Pediculus humanus humanus | Phthiraptera | AAZ001007241 | E1-187-E2-100-E3 | PHUM594410 | 429 | GEKYTTRW | NDNKENSR | 68 (Diptera) |
|  |  | AAZ001007241 | E1-288-E2 | PHUM594420 | 399 | PTKFTTKF | AAQKGITV | 55 (Diptera) |
|  |  | AAZ001007241 | E1-277-E2 | PHUM594430 | 451 | DEKYSTKY | AQKRKIQL | 58 (Diptera) |
|  |  | AAZ001007242 | E1-208-E2 | PHUM594540 | 423 | PTKFTTKF | DFAAKIKV | 54 (Diptera) |
|  |  | AAZ001007243 | E1-89-E2 | PHUM594550 | 384 | ISSYSTRY | DPNFLGKI | 44 (Hymenoptera) |
|  |  | AAZ001007243 | E1-143-E2 | PHUM594660 | 348 | PQKYSTKY | KFMEEPIE | 46 (Coleoptera) |
|  |  |  |  |  |  |  |  |  |

**Table S1.** Aphid ‘CSP’ gene repertoire in comparison to that of moths and lice, genome assembly, and protein identity. *Bombyx mori*: Domestic mulberry silkworm moth (Glossata, Bombycidae); *Pediculus humanus humanus*: Body louse (Anoplura, Pediculidae). Tha p 1: *Thaumetopoea pityocampa* (Pine processionary moth) isoallergen and variant (Allergen Nomenclature; 15-kDa IgE-binding protein); PAN-1: Protein that is both transmembrane and cytoplasmic in nature, encoded by the pan-1 gene in the nematode *Caenorhabditis elegans*, essential for developmental events that take place throughout the mid to late larval stages as wel l as for early larval ecdysis and the execution of the molting cycle during the adult molt, essential control point for the development of larvae and the progression of several tissues during the transition from the larval to adult state. Gene truncations are indicated by the dashed lines (pseudogenes).

In Gene Structure, E: Exon, E1: Exon1, E2: Exon2, E3: Exon3. The number between exons indicates the size of the intron.
