# Supplementary material for: Renaming ‘Chemosensory’ Proteins (CSPs): Lipid/Nucleotide-Binding Proteins — Molecular Nomenclature, Structure, Expression, Function, Evolutionary Networks, Clinical Diseases and Associated Molecular Medicine
Source: Preprints.org preprint supplement (doi:10.20944/preprints202312.1863.v1), 2023-12-27
Supplement: Supplementary file 3 [file supplementary]

1

10

30

40

50

60

70

80

90

100

110

120
