# Supplementary material for: Renaming ‘Chemosensory’ Proteins (CSPs): Lipid/Nucleotide-Binding Proteins — Molecular Nomenclature, Structure, Expression, Function, Evolutionary Networks, Clinical Diseases and Associated Molecular Medicine
Source: Preprints.org preprint supplement (doi:10.20944/preprints202312.1863.v1), 2023-12-27
Supplement: Supplementary file 5 [file supplementary]

\_\_\_\_\_ 0.1 changes

**B.**

WP 058530090  
KTD19891  
98 PlutCD  
CparTRMraz  
98 WP 020776583  
WP 004787694  
Mp10  
AglacW  
BtabCSP1  
BmorCSP8 100  
59 PsolWP 223199665  
AplanCAB3231652  
SFRURICE 011779  
Paegjg6675  
BmorCSP16  
BmorCSP9  
BmorCSP1  
BmorCSP14  
100 BmorCSP6  
WP 089438515  
BmorCSP5  
PpyMucin5AC  
EbalDDB G0285119X1  
98 EcorGTPase  
EbalCSP3  
BmorCSP10  
99 AcruWAS  
AcruMucin2  
85 AaquMucin2  
58 AquaTIF2X3  
99 AmerMucin5AC  
54 AmerMucin2  
96 WsmiSamkc  
AalbSamkc  
AaegCWP  
AAJ0012J  
CsecAllergenThap1  
99 MturRNABP  
99 NocaRNABP  
99 TcasRNABP  
AalbRNABP  
89 LborDNA  
99 LborDNA  
99 TechDNA  
99 WP 044998036  
98 EDK23754  
56 OverDNA  
99 HhatDNA  
98 WP 016226835  
CaudMAGTPA  
ADarRNABP  
BmorRNABP  
HU  
BtabRNABP  
AsinRNABP  
KPK83846  
ArseRNABP  
AalbEXTX4  
AqualF2X3  
EbalCSP4  
IpodCAH2042437  
OIC85870  
OIC81003  
BmorCSP2
